# Supplementary material for: Targeting tumor vasculature to improve antitumor activity of T cells armed ex vivo with T cell engaging bispecific antibody
Source: HighWire-hosted journal article supplement (doi:10.1136/jitc-2023-006680), 2023-03-01

Supplementary files for  
Targeting Tumor Vasculature to Improve Anti-Tumor Activity of T Cells  
Armed Ex vivo with T Cell Engaging Bispecific Antibody

Supplementary table S1. Cross interactions between human and murine VEGF ligands and receptors.

| Ligand | Receptor | Interaction       | Ref          | BVZ<br>Effect expected | DC101<br>Effect expected |
|--------|----------|-------------------|--------------|------------------------|--------------------------|
| hVEGF  | hVEGFR   | strong            | [31]         | Yes                    | No                       |
| hVEGF  | mVEGFR   | weak/intermediate | [30, 32, 33] | Yes                    | Yes                      |
| mVEGF  | mVEGFR   | strong            | [30]         | No                     | Yes                      |
| mVEGF  | hVEGFR   | weak              | [32]         | No                     | No                       |

Supplementary table S2. Bioluminescence intensities (BLIs) of tumor infiltrating lymphocytes (TILs) analyzed by area under curves (AUCs).

| Reference group | Treatment group   | Fold increase in BLI (AUC-BLI) | <i>P</i> -value | Tumor model       | Figure  |
|-----------------|-------------------|--------------------------------|-----------------|-------------------|---------|
| HER2-EATs       | Unarmed T cells   | 0.04                           | 0.02            | osteosarcoma PDX  | Fig. 2A |
| HER2-EATs       | HER2-EATs + BVZ   | 7.5                            | 0.05            | osteosarcoma PDX  | Fig. 2A |
| HER2-EATs       | HER2-EATs + DC101 | 2.4                            | 0.02            | osteosarcoma PDX  | Fig. 2A |
| GD2-EATs        | Unarmed T cells   | 0.004                          | 0.01            | neuroblastoma PDX | Fig. 2B |
| GD2-EATs        | GD2-EATs + BVZ    | 2.8                            | 0.01            | neuroblastoma PDX | Fig. 2B |
| GD2-EATs        | GD2-EATs + DC101  | 8.1                            | 0.05            | neuroblastoma PDX | Fig. 2B |

Supplementary fig. S1. VEGF expression on tumor cells was positively correlated with seeding density, and anti-VEGF antibody reduced serum VEGF levels.

(A) Flow cytometry analysis of VEGF expression on a variety of tumor cell lines with increasing seeding density. M14Luc, HCC1954, NCI-N87, and HL60 cell lines were harvested after 48 hours of incubation for analysis of surface VEGF expression. (B) Mouse serum hVEGF levels were analyzed after treatment with unarmed T cells or HER2-EATs with or without VEGF blockade using bevacizumab (BVZ) or DC101 in the HGSOC1 osteosarcoma PDX model. Asterisks denote significant differences as indicated, \*  $p < 0.05$ , \*\*  $p < 0.01$ , \*\*\*  $p < 0.001$ , \*\*\*\*  $p < 0.0001$ .

Supplementary fig. S2. The effect of VEGF blockade on TH1 cell cytokine levels after EAT therapy.

Anti-VEGF (BVZ) or anti-VEGFR2 (DC101) antibody was given one day before each EAT injection. (A) Mouse serum human TH1 cell cytokine levels were measured 2 hours after the first EAT injection and compared among groups. (B) Serum TH1 cell cytokine levels were analyzed over time. Asterisks denote significant differences as indicated, \*  $p < 0.05$ , \*\*  $p < 0.01$ , \*\*\*  $p < 0.001$ , \*\*\*\*  $p < 0.0001$ .

Supplementary fig. S3. (A) Neuroblastoma PDXs were treated with combination of GD2-EATs and BVZ or DC101. Luciferase-transduced T cells [Luc(+) T cells] were used for GD2-EATs or unarmed T cell injection on day 0 of treatment. Non-luciferase-transduced T cells or GD2-EATs were used for following injection on day 4 post-treatment. Bioluminescence of Luc(+) unarmed T cells or Luc(+) GD2-EATs in tumors were monitored over time.

Supplementary fig. S4. VEGF blockade enhanced BsAb-driven T cell infiltration into solid tumors.

(A) 143B osteosarcoma CDXs were treated with a combination of unarmed T cells or GD2-EATs and BVZ or DC101, and the tumors were harvested and analyzed by flow cytometry on day 60 post-treatment. (B) The tumors were also analyzed by immunohistochemical (IHC) staining of human CD3, and the CD3(+) T cells were counted with Q-path 0.1.2 and compared among groups. G1, unarmed T cells; G2, unarmed T cells plus BVZ; G3, unarmed T cells plus DC101; G4, GD2-EATs; G5, GD2-EATs plus BVZ; G6, GD2-EATs plus CD101. Asterisks denote significant differences as indicated, \*  $p < 0.05$ , \*\*  $p < 0.01$ , \*\*\*  $p < 0.001$ , \*\*\*\*  $p < 0.0001$ .

Supplementary fig. S5. The effect of VEGF blockade on complete blood counts and tumor infiltrating myeloid cells in a neuroblastoma PDX model.

(A) GD2-EATs with or without VEGF blockade were administered to treat neuroblastoma PDXs, and complete blood counts (CBC) were analyzed on day 5 post-EAT treatment. (B) Tumors were harvested on day 10 post-EAT treatment, and tumor infiltrating myeloid cells (TIMs) were analyzed by flow cytometry and compared among groups. Asterisks denote significant differences as indicated, \*  $p < 0.05$ , \*\*  $p < 0.01$ , \*\*\*  $p < 0.001$ , \*\*\*\*  $p < 0.0001$ .



Supplementary fig. S6. The effect of VEGF blockade on complete blood counts (CBC) and tumor infiltrating myeloid cells (TIMs) in an osteosarcoma CDX model.

(A) Unarmed T cells or GD2-EATs with or without VEGF blockade were administered to 143B osteosarcoma bearing mice, and CBC was analyzed on day 5 post-EAT treatment. (B) Tumors were harvested on day 60 post-treatment, and tumor infiltrating myeloid cells (TIMs) including PMN-MDSC, M-MDSC, and TAMs were analyzed by flow cytometry and compared among groups.

(A) fig. S1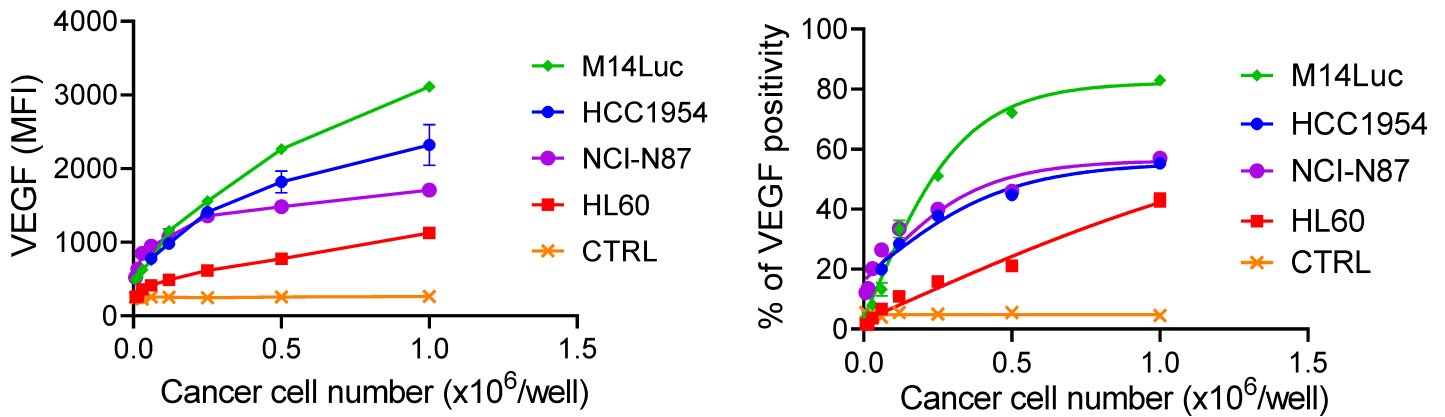

(B)

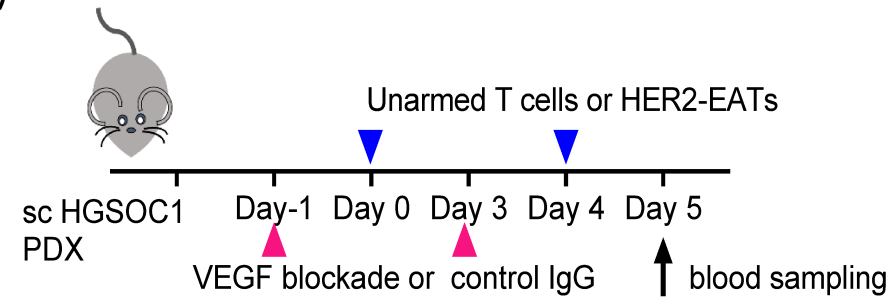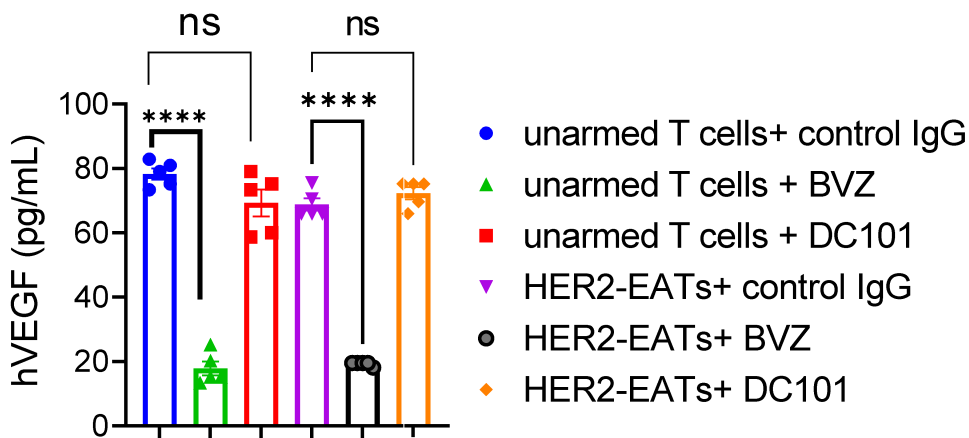

(A) fig. S2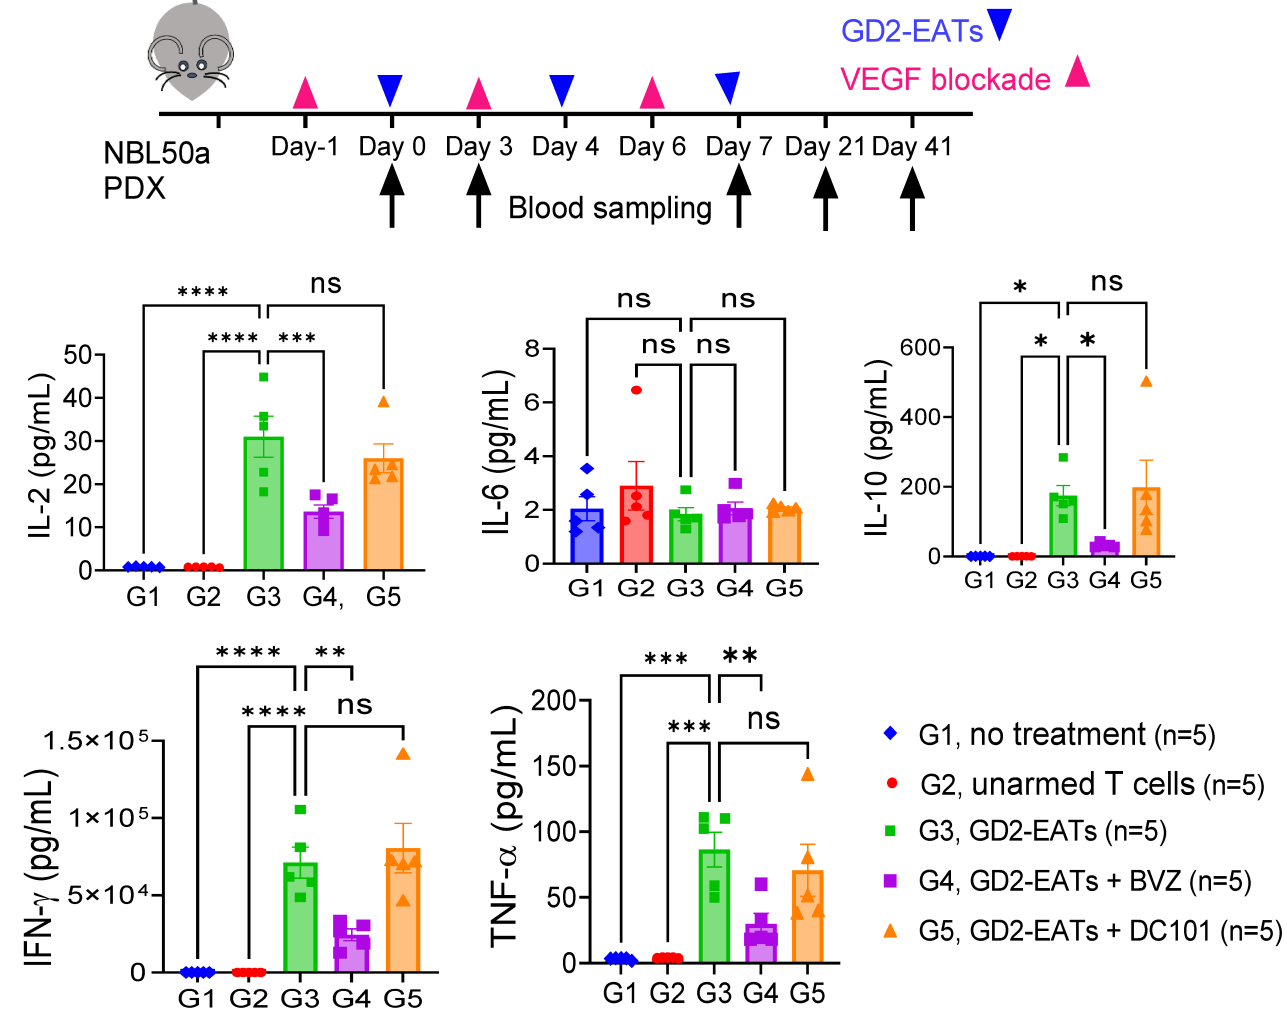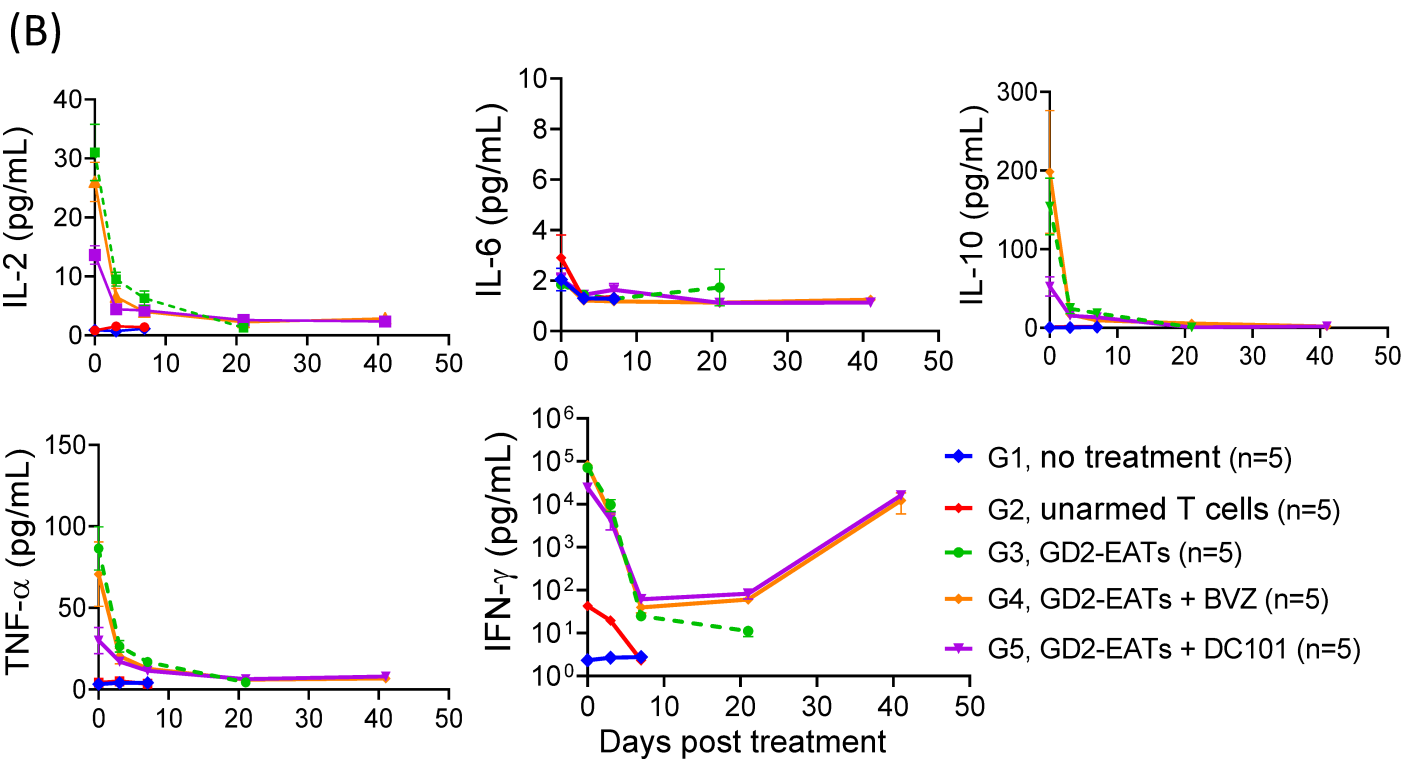

(A)

fig. S3

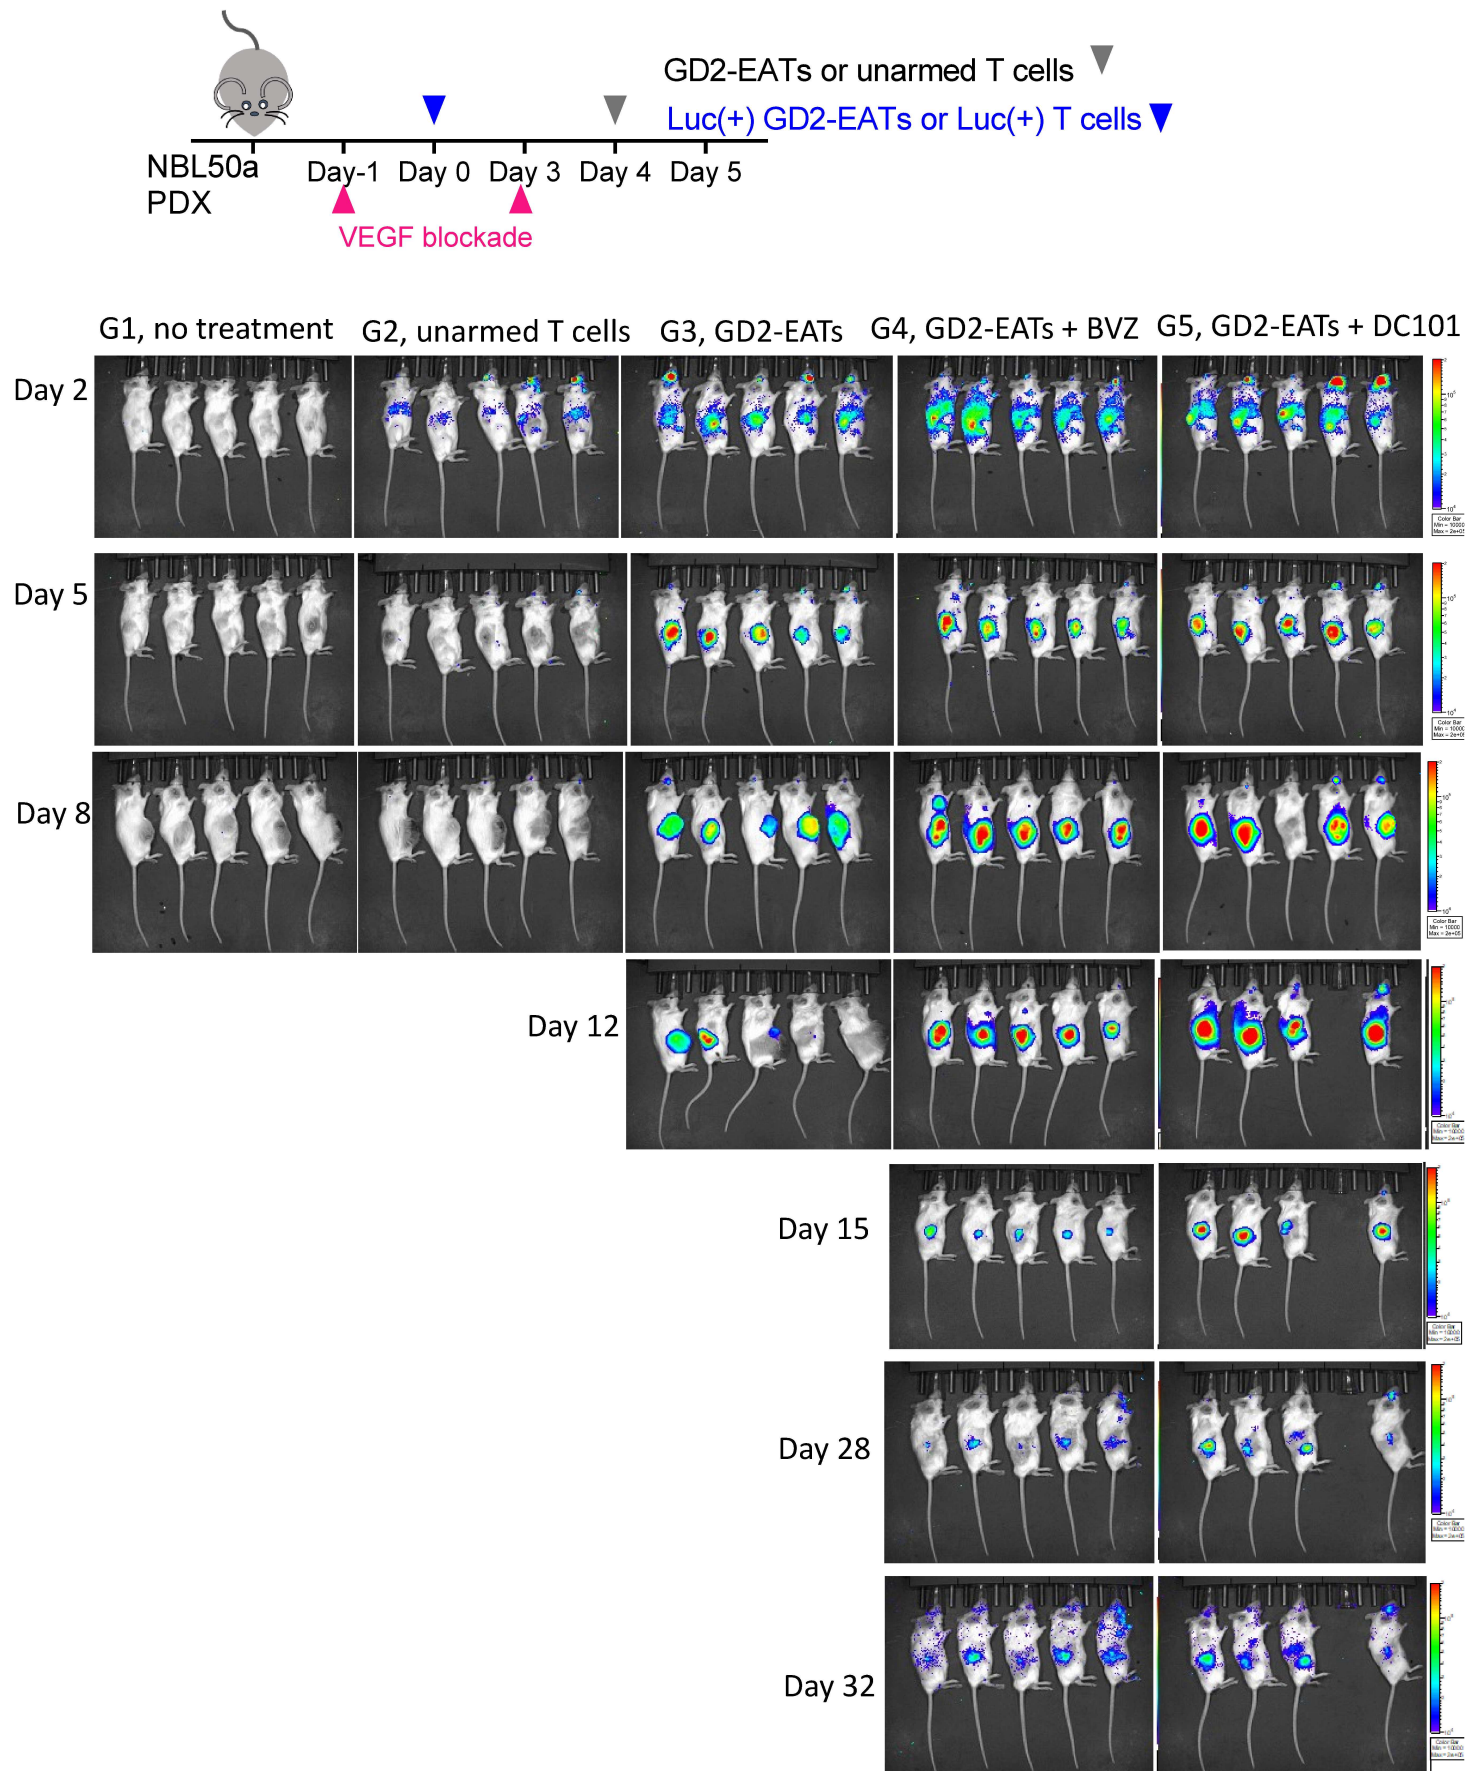

(A) fig. S4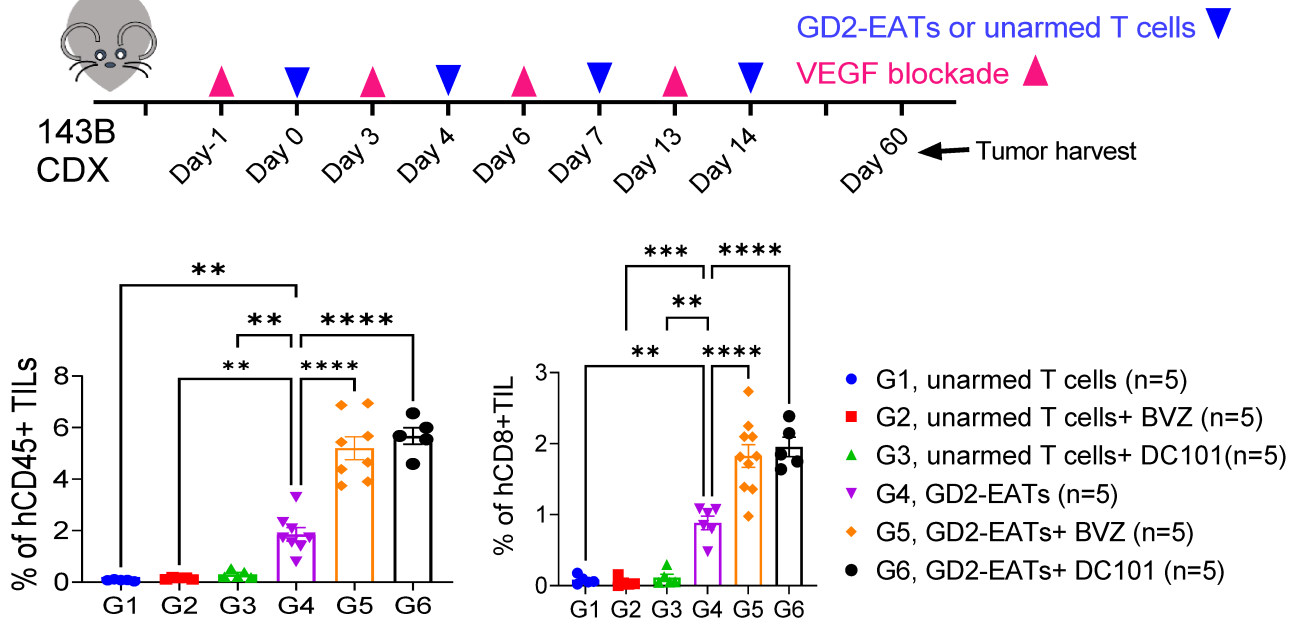

(B)

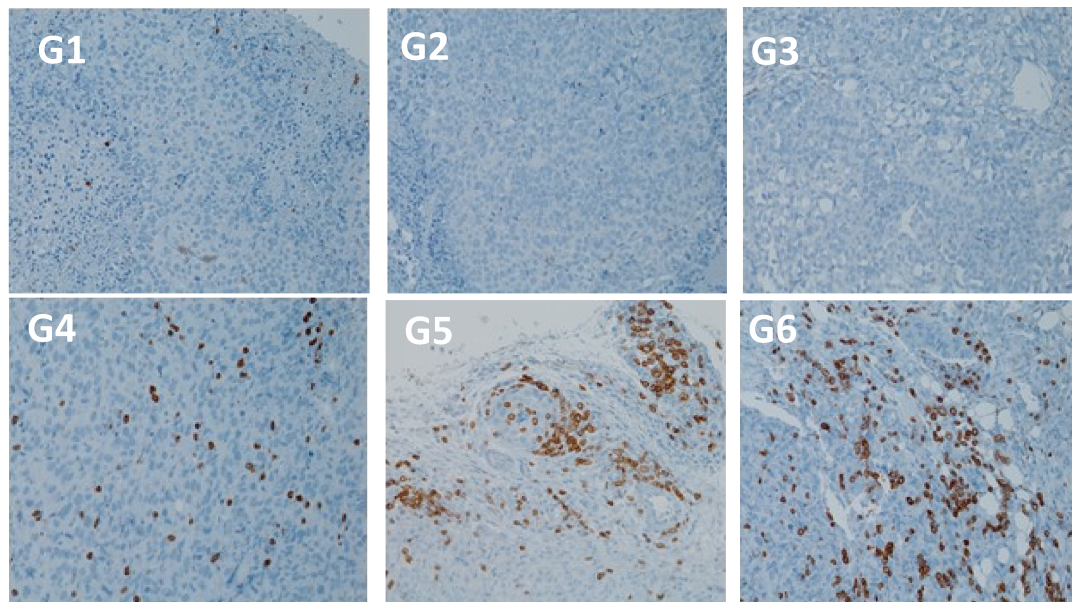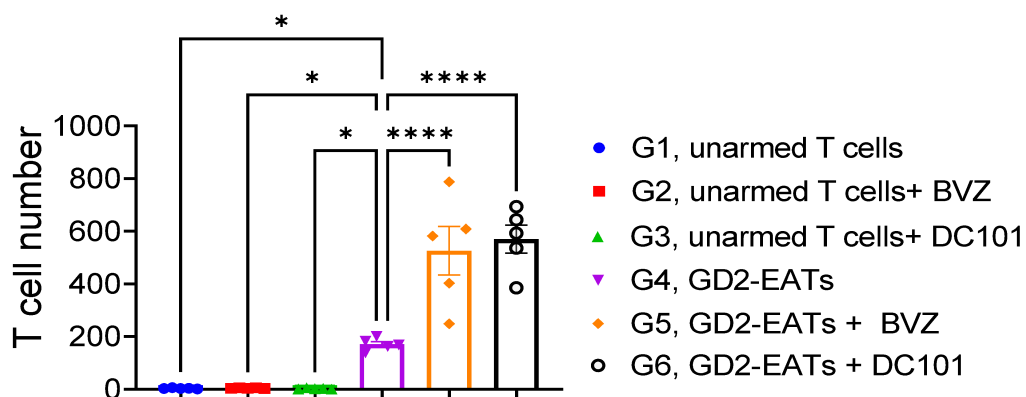

fig. S5

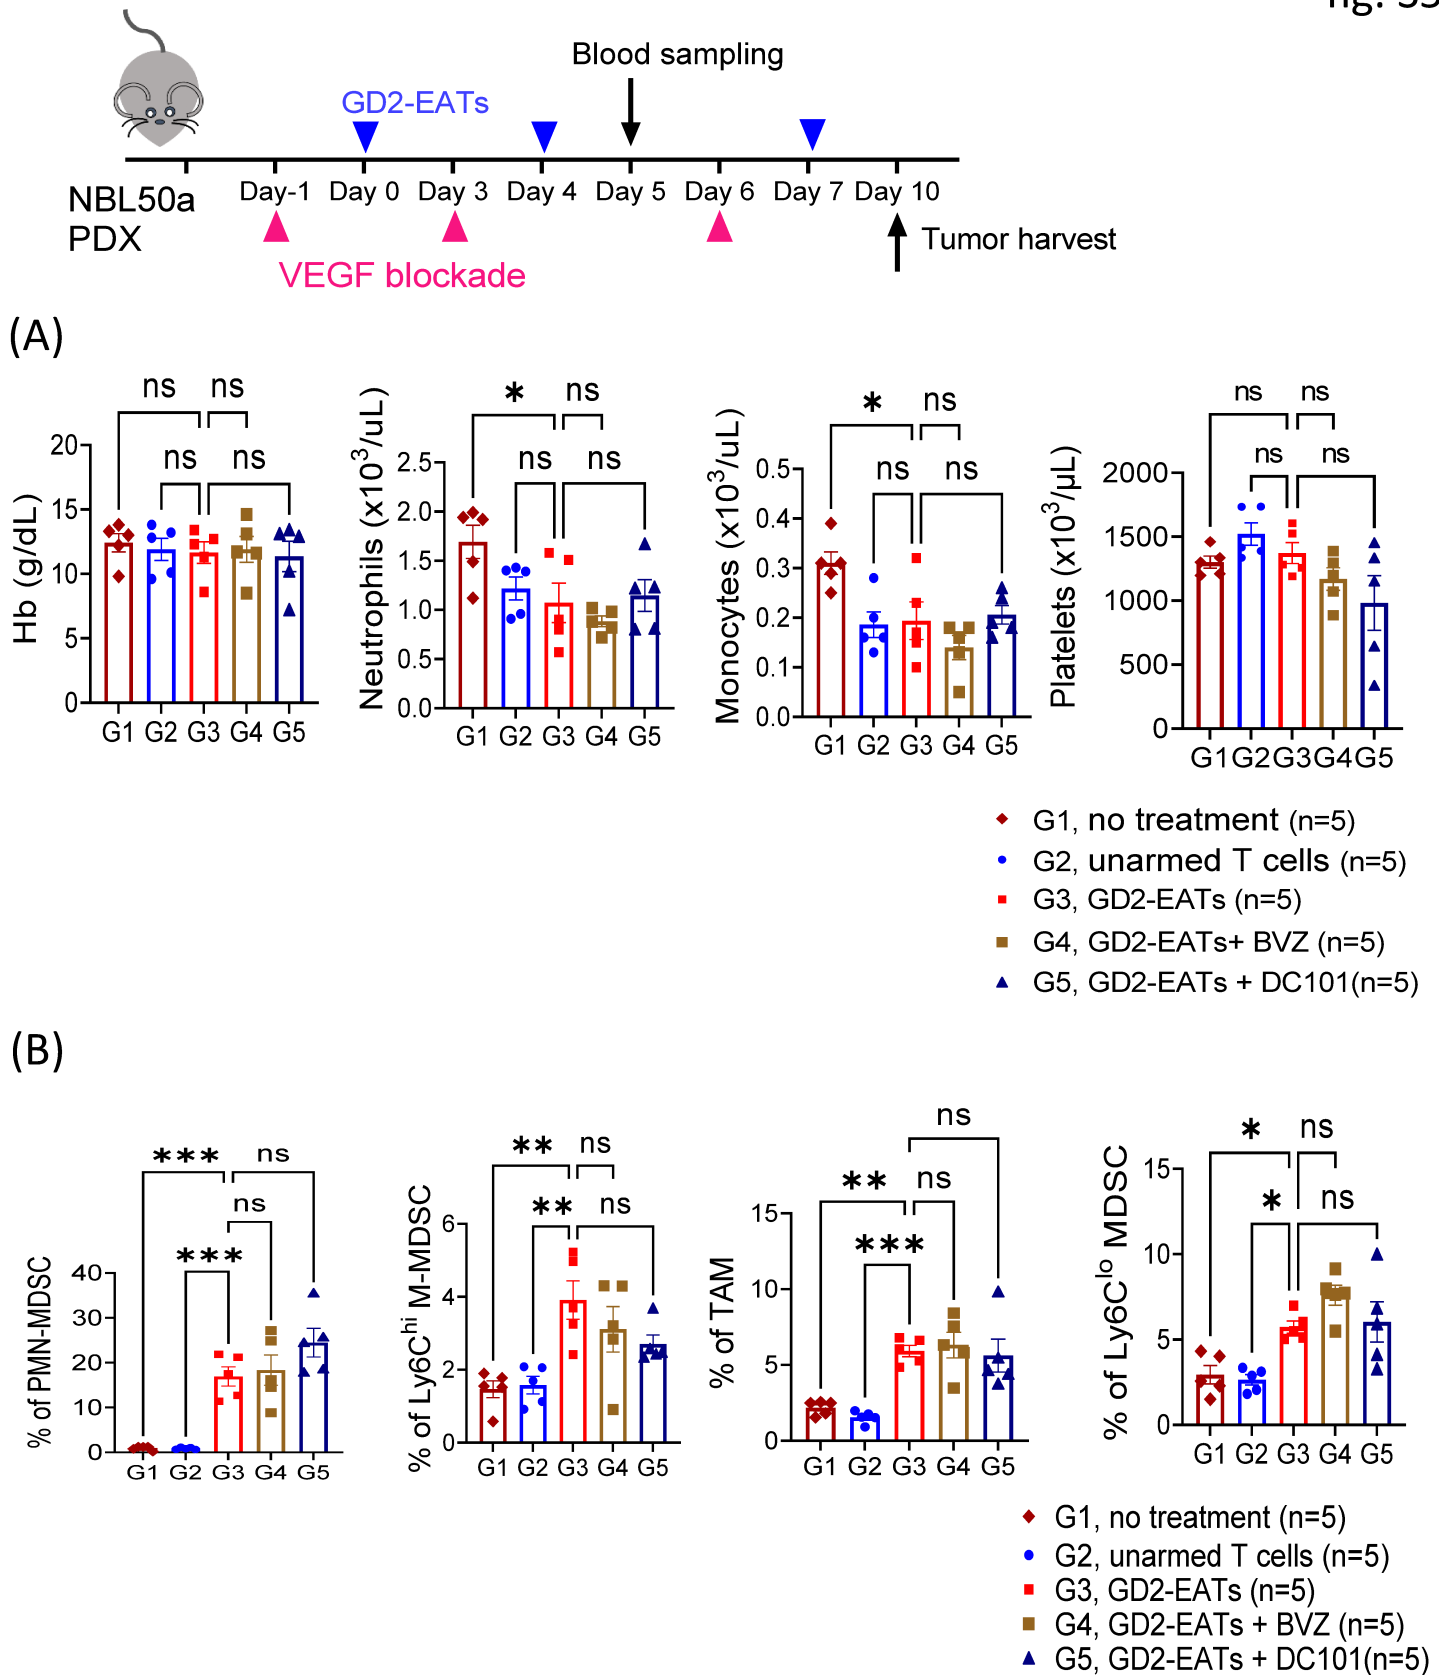

fig. S6

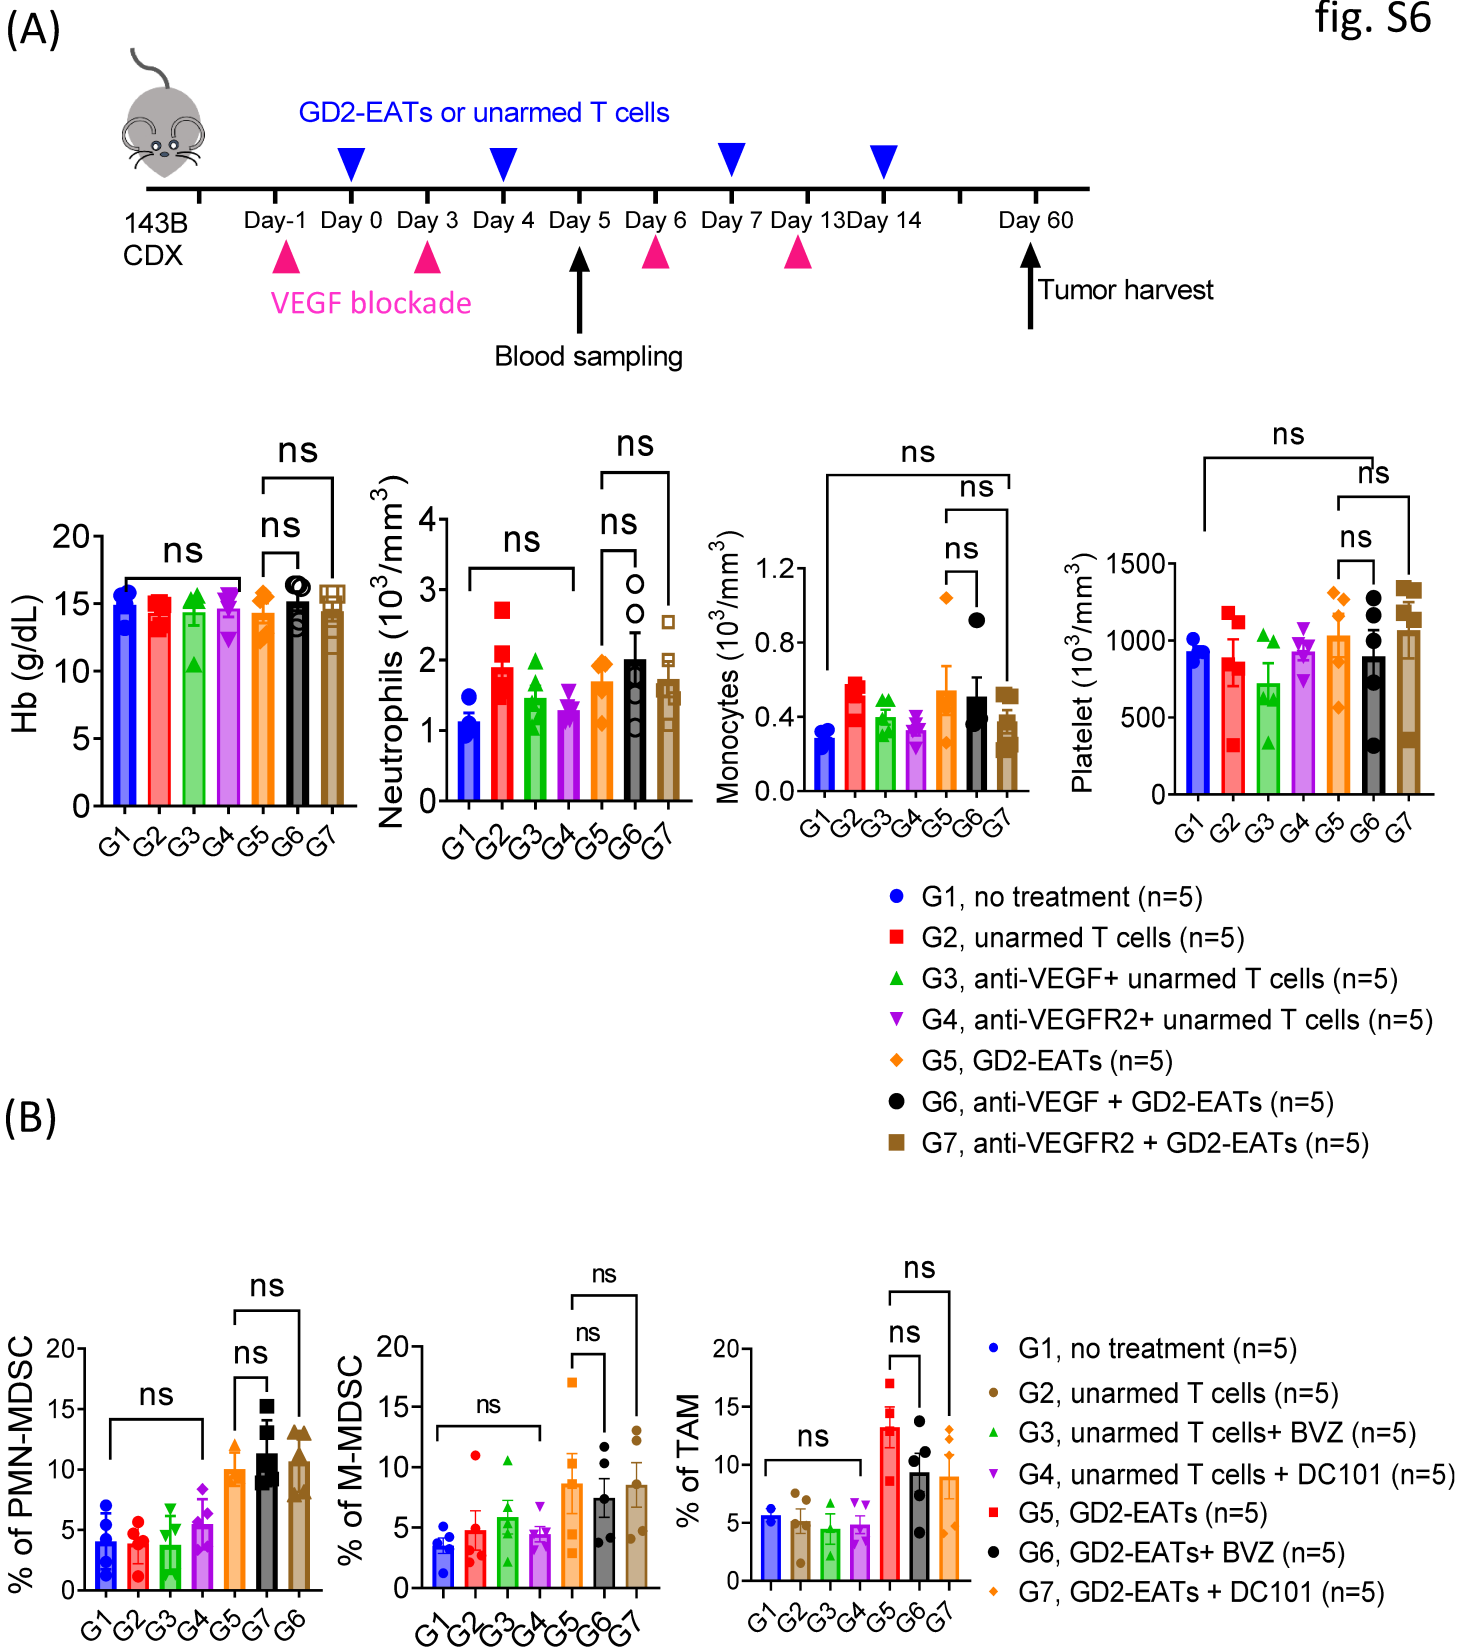

Supplement: jitc-2023-006680supp001_data_supplement.pdf [file jitc-2023-006680supp001_data_supplement.pdf]
